# Supplementary material for: The P-site A76 2′-OH acts as a peptidyl shuttle in a stepwise peptidyl transfer mechanism
Source: Royal Society of Chemistry journal article supplement (doi:10.1039/c5ra02767e), 2015-01-01
Supplement: c5ra02767e1.pdf [file c5ra02767e1.pdf]

## Geometry of the stationary structures based on the structure of Ramakrishnan

### Reactant

|   |              |             |             |
|---|--------------|-------------|-------------|
| C | -1.54661000  | -4.48701900 | -0.49233900 |
| O | -2.99835300  | -4.35706100 | -0.80009500 |
| C | -3.45033600  | -3.03304200 | -0.40461000 |
| N | -4.83088300  | -3.14244500 | 0.03251400  |
| C | -5.88228800  | -2.29267500 | -0.27058900 |
| N | -5.91196100  | -1.16566900 | -1.02781600 |
| C | -7.14866300  | -0.61702500 | -1.11932100 |
| N | -8.28229200  | -1.05407700 | -0.54317600 |
| C | -8.23751600  | -2.18129700 | 0.22281100  |
| N | -9.37645800  | -2.61791400 | 0.80019500  |
| C | -7.00342500  | -2.84366400 | 0.37284700  |
| N | -6.66053900  | -4.01122700 | 1.05504100  |
| C | -5.36353600  | -4.15932300 | 0.82934000  |
| C | -2.44672800  | -2.59452000 | 0.69289300  |
| O | -2.47267500  | -1.20761300 | 0.98667300  |
| C | -1.12539500  | -3.15966900 | 0.13404600  |
| O | -0.73132800  | -2.19472400 | -0.91189200 |
| N | 1.21973600   | 0.29783500  | -1.05262600 |
| C | 0.88035100   | -0.77313400 | -1.98706200 |
| C | 0.61182800   | -2.07744300 | -1.24917800 |
| O | 1.44902100   | -2.90855200 | -0.87191000 |
| C | 4.44688400   | -2.53432600 | 2.33538900  |
| O | 5.70584700   | -1.74617100 | 2.42069800  |
| C | 5.73768200   | -0.78256900 | 1.33981000  |
| N | 7.08617500   | -0.79732500 | 0.76337100  |
| C | 7.46210800   | -0.26344400 | -0.45705200 |
| N | 6.68693100   | 0.29998800  | -1.41806000 |
| C | 7.39923100   | 0.71258000  | -2.49243700 |
| N | 8.73184900   | 0.61087800  | -2.67219900 |
| C | 9.49235700   | 0.03574600  | -1.69773500 |
| N | 10.82547500  | -0.06438500 | -1.89304500 |
| C | 8.85339900   | -0.42878100 | -0.52958300 |
| N | 9.33584600   | -1.05300400 | 0.62281500  |
| C | 8.25770700   | -1.25340200 | 1.37170500  |
| C | 4.64346600   | -1.23442500 | 0.34298000  |
| O | 4.14314600   | -0.19557800 | -0.49066700 |
| C | 3.59235100   | -1.83000500 | 1.28444000  |
| O | 2.88131800   | -0.69114600 | 1.90369100  |
| N | -0.23293500  | 0.61627000  | 1.84057600  |
| C | 0.90472300   | 0.40221900  | 2.72920800  |
| C | 1.58313200   | -0.88755100 | 2.31491000  |
| O | 1.04066400   | -1.99994000 | 2.31213700  |
| H | -1.01150600  | -4.69965600 | -1.41836600 |
| H | -1.42750000  | -5.32395300 | 0.20165800  |
| H | -0.32429500  | -3.23241400 | 0.86927900  |
| H | -2.48484800  | -0.03238200 | -1.86467400 |
| H | -0.00381100  | -0.50668900 | -2.56983100 |
| H | -2.69179100  | -3.12098700 | 1.62159600  |
| H | -3.42846400  | -2.33614800 | -1.24784800 |
| H | -7.23167100  | 0.27358000  | -1.72973400 |
| H | -10.22958100 | -2.10419200 | 0.64982400  |

|   |             |             |             |
|---|-------------|-------------|-------------|
| H | -4.75678900 | -4.97942000 | 1.17063900  |
| H | 3.98534500  | -2.53980500 | 3.32250500  |
| H | 4.69476900  | -3.55733100 | 2.03554800  |
| H | 6.83835000  | 1.17234300  | -3.29559800 |
| H | 11.22088900 | 0.28834600  | -2.74944600 |
| H | 2.19056700  | 0.27796700  | -0.74456000 |
| H | 0.54875500  | 0.45210000  | -0.29888000 |
| H | 1.61391400  | 1.22472400  | 2.62455200  |
| H | -0.57817000 | 1.57078900  | 1.76493200  |
| H | -0.96846900 | -0.08323700 | 1.90302800  |
| H | 2.87241200  | -2.47470300 | 0.78061000  |
| H | 5.05230500  | -2.06609500 | -0.25270300 |
| H | 5.50912800  | 0.21856300  | 1.72035000  |
| H | 8.23319100  | -1.72063100 | 2.34000900  |
| H | 4.90781400  | 0.14696300  | -1.04189500 |
| C | -3.75090700 | 2.72853700  | -2.87867800 |
| O | -2.28797200 | 2.94963200  | -2.89777400 |
| C | -1.79615200 | 2.76930800  | -1.55276900 |
| N | -1.90323900 | 4.06893600  | -0.84412500 |
| C | -1.76445700 | 4.33469000  | 0.51239300  |
| N | -1.56740700 | 3.47978500  | 1.54659000  |
| C | -1.49912300 | 4.11103600  | 2.74109000  |
| N | -1.59623400 | 5.43688100  | 2.98040300  |
| C | -1.78108400 | 6.27973300  | 1.92780900  |
| N | -1.87093800 | 7.60823000  | 2.16604300  |
| C | -1.87072700 | 5.73117900  | 0.63226900  |
| N | -2.04965100 | 6.32606300  | -0.61683000 |
| C | -2.05256100 | 5.31010100  | -1.46993500 |
| C | -2.68842900 | 1.68173700  | -0.92413400 |
| O | -2.04384900 | 0.39822200  | -1.08228900 |
| C | -4.00992000 | 1.67588600  | -1.79531200 |
| O | -4.16250500 | 0.37718500  | -2.41596200 |
| H | -4.03092900 | 2.36172100  | -3.86440600 |
| H | -4.25896000 | 3.67516200  | -2.66053200 |
| H | -4.88408500 | 1.91622700  | -1.18309300 |
| H | -2.17755300 | -0.65532500 | 0.19945800  |
| H | -2.86094800 | 1.84551200  | 0.13848100  |
| H | -0.75397800 | 2.44720600  | -1.60783600 |
| H | -1.34576000 | 3.48009500  | 3.60764000  |
| H | -1.79397700 | 7.94014000  | 3.11350200  |
| H | -2.15018400 | 5.38167900  | -2.53860000 |
| H | -4.77688500 | -0.23826500 | -1.88917300 |
| H | -2.00002000 | 8.25516700  | 1.40544500  |
| H | 1.72260000  | -0.93443900 | -2.66428400 |
| H | 0.64483500  | 0.31020000  | 3.80058500  |
| H | -9.37426800 | -3.45067800 | 1.36676000  |
| H | 11.41457700 | -0.48456400 | -1.19275800 |

TS

|   |             |             |             |
|---|-------------|-------------|-------------|
| C | -3.77434800 | -4.18808500 | -0.82277100 |
| O | -5.09523000 | -3.53708400 | -0.63581100 |
| C | -4.84547800 | -2.12194600 | -0.44518300 |
| N | -6.03984400 | -1.53997400 | 0.13801800  |
| C | -6.57094200 | -0.29469000 | -0.14444800 |
| N | -6.13309600 | 0.66184100  | -1.00090400 |
| C | -6.93768000 | 1.75104100  | -1.03440400 |

|   |              |             |             |
|---|--------------|-------------|-------------|
| N | -8.05967200  | 1.96072800  | -0.31962800 |
| C | -8.48116400  | 0.99344700  | 0.54388900  |
| N | -9.60742800  | 1.20873500  | 1.25774300  |
| C | -7.72504700  | -0.19093400 | 0.64946800  |
| N | -7.91006800  | -1.34913300 | 1.40625900  |
| C | -6.88999100  | -2.13039900 | 1.07456100  |
| C | -3.56615300  | -2.05079300 | 0.41070800  |
| O | -2.78530300  | -0.88964000 | 0.07564900  |
| C | -2.72770400  | -3.28769000 | -0.13673000 |
| O | -1.79744700  | -2.68567000 | -1.04373700 |
| N | 0.79663400   | -3.35695300 | -2.33026300 |
| C | 0.78977500   | -2.22690000 | -1.42292300 |
| C | 0.15243800   | -2.53767900 | -0.08213100 |
| O | 0.22351900   | -3.55830900 | 0.60015500  |
| C | 4.36750700   | -1.29058500 | 3.13535500  |
| O | 4.85117700   | -0.07573100 | 2.43144100  |
| C | 4.84605400   | -0.31645100 | 1.00027200  |
| N | 6.15672800   | 0.05425700  | 0.45966000  |
| C | 6.66178400   | -0.31250000 | -0.77703100 |
| N | 6.12673300   | -1.14795600 | -1.70305000 |
| C | 6.90470700   | -1.27775900 | -2.80392200 |
| N | 8.09253600   | -0.68316800 | -3.03318200 |
| C | 8.61499900   | 0.14950100  | -2.08814800 |
| N | 9.80695600   | 0.73540600  | -2.33177400 |
| C | 7.88569700   | 0.36108200  | -0.89940700 |
| N | 8.13823100   | 1.13438200  | 0.23629900  |
| C | 7.08667800   | 0.93384400  | 1.02079700  |
| C | 4.53243300   | -1.82377900 | 0.82270100  |
| O | 3.91529800   | -2.15722600 | -0.41084800 |
| C | 3.67378600   | -2.11787500 | 2.05477700  |
| O | 2.31984900   | -1.58230700 | 1.79395100  |
| N | -0.17709200  | -1.20275800 | 0.76644100  |
| C | -0.03301400  | -1.43709000 | 2.23224800  |
| C | 1.31467600   | -1.97773400 | 2.64903000  |
| O | 1.50998500   | -2.62832200 | 3.67490600  |
| H | -3.54873800  | -4.26346700 | -1.89073400 |
| H | -3.86473500  | -5.18241700 | -0.38289400 |
| H | -2.18983200  | -3.81793300 | 0.66118400  |
| H | -2.25596600  | -0.10750200 | -2.62532900 |
| H | 1.82423400   | -1.92707400 | -1.20232100 |
| H | -3.79377600  | -2.09885200 | 1.47799900  |
| H | -4.66020600  | -1.60871200 | -1.39617700 |
| H | -6.64557600  | 2.54073800  | -1.71510200 |
| H | -10.10949800 | 2.07230500  | 1.13011600  |
| H | -6.71686300  | -3.12984100 | 1.43264600  |
| H | 3.70302800   | -0.96996300 | 3.93515100  |
| H | 5.22051400   | -1.83104700 | 3.55948400  |
| H | 6.53290000   | -1.92983200 | -3.58329300 |
| H | 10.27421300  | 0.54594700  | -3.20370200 |
| H | -0.14874500  | -3.65179200 | -2.55454900 |
| H | 1.37186500   | -4.12938000 | -2.01133000 |
| H | -0.21608600  | -0.48731300 | 2.74575500  |
| H | 0.39429300   | -0.39371100 | 0.45961600  |
| H | -1.20048400  | -0.96307700 | 0.58708800  |
| H | 3.58589400   | -3.17725300 | 2.29551100  |
| H | 5.47584400   | -2.37696600 | 0.96068100  |

|   |             |             |             |
|---|-------------|-------------|-------------|
| H | 4.06678300  | 0.29325800  | 0.53213500  |
| H | 6.92573500  | 1.36605600  | 1.99257600  |
| H | 4.58081800  | -1.95289700 | -1.13458900 |
| C | -2.57870000 | 2.89591100  | -3.25951200 |
| O | -1.27681400 | 3.41313600  | -2.79424100 |
| C | -0.72684900 | 2.51878000  | -1.78847100 |
| N | -0.40485800 | 3.34394800  | -0.61331000 |
| C | 0.35695000  | 2.96698800  | 0.48192100  |
| N | 0.91283200  | 1.76151600  | 0.78428200  |
| C | 1.64408100  | 1.80700900  | 1.92788000  |
| N | 1.82331500  | 2.85750700  | 2.75594300  |
| C | 1.23243700  | 4.04476400  | 2.44927000  |
| N | 1.40356800  | 5.09324300  | 3.28470800  |
| C | 0.47459200  | 4.12968100  | 1.26535600  |
| N | -0.19606300 | 5.19939900  | 0.67519900  |
| C | -0.70161700 | 4.69684500  | -0.44470400 |
| C | -1.78985900 | 1.45029100  | -1.50929600 |
| O | -1.41836100 | 0.27654200  | -2.26832600 |
| C | -3.10157300 | 2.03051900  | -2.10780400 |
| O | -3.94377500 | 0.98594700  | -2.61683900 |
| H | -2.43866100 | 2.27618700  | -4.14945000 |
| H | -3.19810300 | 3.76154500  | -3.49630100 |
| H | -3.61899100 | 2.63672800  | -1.35496700 |
| H | -2.20186400 | -1.44272300 | -0.76482400 |
| H | -1.89073200 | 1.20671700  | -0.45046100 |
| H | 0.19278500  | 2.05459600  | -2.15270800 |
| H | 2.15666200  | 0.89584400  | 2.20483700  |
| H | 1.97123000  | 4.97511900  | 4.10795300  |
| H | -1.25989300 | 5.23724600  | -1.18675400 |
| H | -4.71580700 | 0.78318600  | -1.99795600 |
| H | 0.98713100  | 5.98550500  | 3.07354700  |
| H | 0.26308500  | -1.38417000 | -1.87743800 |
| H | -0.78299800 | -2.15997200 | 2.54959400  |
| H | -9.94853900 | 0.50805600  | 1.89559400  |
| H | 10.21913700 | 1.35814100  | -1.65616500 |

Product

|   |             |             |             |
|---|-------------|-------------|-------------|
| C | -0.87847600 | -4.92222400 | 1.87374500  |
| O | -1.01607800 | -5.23476200 | 0.42798100  |
| C | -0.44304700 | -4.16457100 | -0.33711800 |
| N | -1.54444300 | -3.27015200 | -0.77939400 |
| C | -1.50859500 | -2.29465500 | -1.76190900 |
| N | -0.47388900 | -1.85489500 | -2.52299600 |
| C | -0.83607000 | -0.90176400 | -3.41467400 |
| N | -2.05693500 | -0.36314600 | -3.58801600 |
| C | -3.08634000 | -0.81035800 | -2.81563400 |
| N | -4.30868000 | -0.25993800 | -2.99506000 |
| C | -2.82917000 | -1.82285500 | -1.87263900 |
| N | -3.66713400 | -2.49201800 | -0.98273900 |
| C | -2.87116500 | -3.35167800 | -0.35920400 |
| C | 0.60358500  | -3.45613000 | 0.56292000  |
| O | 1.91920000  | -3.85460800 | 0.13013600  |
| C | 0.36874700  | -4.05340600 | 2.00932800  |
| O | 1.51602200  | -4.85126100 | 2.39451600  |
| N | 3.35820900  | -3.08251700 | 4.01149300  |

|   |             |             |             |
|---|-------------|-------------|-------------|
| C | 3.41387100  | -1.91049300 | 3.16646900  |
| C | 2.13058000  | -1.06110800 | 3.12952400  |
| O | 1.08628600  | -1.39210500 | 3.74485700  |
| C | -1.46840200 | 4.00942800  | -0.32229000 |
| O | -2.72690400 | 4.14691100  | 0.45330200  |
| C | -3.18982800 | 2.82900500  | 0.84526600  |
| N | -4.64818500 | 2.81591300  | 0.73507200  |
| C | -5.45374900 | 1.69597500  | 0.60883100  |
| N | -5.09115400 | 0.39727300  | 0.47081700  |
| C | -6.14878100 | -0.44018100 | 0.34320900  |
| N | -7.45458900 | -0.09667200 | 0.35156400  |
| C | -7.79930600 | 1.21459600  | 0.50165900  |
| N | -9.11048300 | 1.53928600  | 0.51404600  |
| C | -6.77212200 | 2.17320400  | 0.63105600  |
| N | -6.79009000 | 3.56335900  | 0.77081100  |
| C | -5.51080200 | 3.91120600  | 0.83472900  |
| C | -2.48995100 | 1.84379000  | -0.12085400 |
| O | -2.35854100 | 0.51929100  | 0.37671600  |
| C | -1.12674000 | 2.52286800  | -0.30995700 |
| O | -0.31511600 | 2.27354000  | 0.89260200  |
| N | 2.19820500  | 0.08777000  | 2.38350500  |
| C | 1.06386600  | 0.98504700  | 2.30520700  |
| C | 0.55860200  | 1.20706600  | 0.89908500  |
| O | 0.87453300  | 0.57803500  | -0.11462600 |
| H | -0.76720900 | -5.87140600 | 2.39491900  |
| H | -1.78152600 | -4.40257800 | 2.21793800  |
| H | 0.24833300  | -3.26424000 | 2.75357300  |
| H | 3.29610300  | -2.60830900 | -1.82302300 |
| H | 4.24211300  | -1.25615100 | 3.47447000  |
| H | 0.48469600  | -2.36945700 | 0.54201700  |
| H | 0.03979500  | -4.58065800 | -1.22203300 |
| H | -0.05163800 | -0.53747400 | -4.06567100 |
| H | -4.43158500 | 0.42546500  | -3.72271500 |
| H | -3.18344500 | -4.07387800 | 0.37233200  |
| H | -0.69669100 | 4.60923200  | 0.16113400  |
| H | -1.65209000 | 4.37779300  | -1.33574800 |
| H | -5.90851900 | -1.48580200 | 0.19967100  |
| H | -9.79492300 | 0.80567400  | 0.42523500  |
| H | 2.75328500  | -3.81817500 | 3.64590000  |
| H | 3.14988100  | -2.87476200 | 4.98175000  |
| H | 0.25394400  | 0.53267600  | 2.89198300  |
| H | 3.05428900  | 0.33179900  | 1.87793700  |
| H | 2.53507000  | -3.09841400 | -0.08319400 |
| H | -0.58782100 | 2.16395600  | -1.18694100 |
| H | -3.02265400 | 1.87286500  | -1.08368700 |
| H | -2.89113100 | 2.61533200  | 1.87731100  |
| H | -5.12895600 | 4.91195000  | 0.93421400  |
| H | -3.28545100 | 0.14126800  | 0.45067900  |
| C | 3.71500500  | -0.03528600 | -3.59338100 |
| O | 5.05674200  | -0.39434600 | -3.07539300 |
| C | 4.99871200  | -0.29830800 | -1.63667600 |
| N | 5.30633500  | 1.10917800  | -1.26772300 |
| C | 5.16844200  | 1.77829400  | -0.05467100 |
| N | 4.55725100  | 1.40086000  | 1.09842900  |
| C | 4.66466900  | 2.32938400  | 2.08040100  |
| N | 5.27141100  | 3.53162800  | 2.02033700  |

|   |             |             |             |
|---|-------------|-------------|-------------|
| C | 5.86440200  | 3.90342500  | 0.85315600  |
| N | 6.46960100  | 5.10958400  | 0.78484700  |
| C | 5.82658100  | 3.00932700  | -0.23493800 |
| N | 6.36391600  | 3.10866100  | -1.51671300 |
| C | 6.04759400  | 1.96096300  | -2.09697300 |
| C | 3.58459500  | -0.75884300 | -1.24670600 |
| O | 3.62433300  | -2.18509800 | -0.97660600 |
| C | 2.71421300  | -0.53863700 | -2.54884600 |
| O | 2.19162900  | -1.81910700 | -2.98178700 |
| H | 3.59495200  | -0.55122800 | -4.54393900 |
| H | 3.66010400  | 1.05077200  | -3.73216700 |
| H | 1.90393700  | 0.16346700  | -2.34696000 |
| H | 2.10816500  | -4.88001700 | 1.59781200  |
| H | 3.17801300  | -0.25000000 | -0.37884700 |
| H | 5.75975300  | -0.96237800 | -1.22642200 |
| H | 4.20340800  | 2.07703300  | 3.02742800  |
| H | 6.47954000  | 5.69833700  | 1.60180600  |
| H | 6.31319200  | 1.66074000  | -3.09477300 |
| H | 1.22841800  | -1.95899000 | -2.69760200 |
| H | 6.92784000  | 5.40257100  | -0.06273600 |
| H | 3.64656700  | -2.22212100 | 2.13904200  |
| H | 1.27728600  | 1.96553600  | 2.74818700  |
| H | -5.09256200 | -0.55701000 | -2.43726900 |
| H | -9.40027800 | 2.49696100  | 0.62815600  |

### Geometry of the stationary structures based on the structure of Steitz

Reactant

|   |             |             |             |
|---|-------------|-------------|-------------|
| N | -1.98171400 | 3.01193300  | -2.31924700 |
| H | -1.07852500 | 2.54595700  | -2.25070800 |
| C | -2.92620500 | 2.28735800  | -1.50430700 |
| C | -2.94438300 | 0.78824400  | -1.73658100 |
| H | -2.70051000 | 2.43584800  | -0.44075400 |
| H | -3.94260900 | 2.66579400  | -1.66270200 |
| O | -2.29895600 | 0.18392900  | -2.55377700 |
| H | -2.26219900 | 2.98700800  | -3.29423600 |
| N | 0.91615500  | -0.88649900 | -0.23447000 |
| C | 1.51725300  | -1.07274400 | -1.56240200 |
| C | 2.81696400  | -0.29351500 | -1.51314400 |
| H | 1.71992900  | -2.11818100 | -1.81810700 |
| H | 0.86090000  | -0.62201400 | -2.31192300 |
| O | 2.89285900  | 0.91061000  | -1.56859800 |
| O | 3.86867600  | -1.10318200 | -1.30224000 |
| O | -3.82317600 | 0.17130900  | -0.89896100 |
| C | -3.90722700 | -1.24421100 | -1.03661400 |
| C | -5.05116500 | -1.78339500 | -0.16229800 |
| H | -4.05772100 | -1.48114900 | -2.09405200 |
| C | -2.65156300 | -1.98553300 | -0.52167900 |
| H | -5.38581300 | -1.03249700 | 0.56150700  |
| O | -4.52745800 | -2.90255600 | 0.55230500  |
| C | -3.28750300 | -3.28568300 | -0.04159200 |
| H | -1.93904400 | -2.14254300 | -1.33585800 |
| O | -1.98342800 | -1.27692900 | 0.49425000  |
| H | -2.68717200 | -3.79513400 | 0.71570700  |
| H | -2.47472300 | -1.35421000 | 1.35659000  |
| H | -5.90798000 | -2.10231600 | -0.76488500 |

|   |             |             |             |
|---|-------------|-------------|-------------|
| H | -3.46815900 | -3.96775800 | -0.88507800 |
| H | 1.57161800  | -1.18257800 | 0.48752800  |
| H | 0.04167300  | -1.39647400 | -0.12089800 |
| C | 5.03637400  | -0.46061800 | -0.78851400 |
| C | 6.19836400  | -1.46412100 | -0.82496800 |
| C | 4.83473000  | -0.17949500 | 0.73943300  |
| H | 5.22407500  | 0.44942700  | -1.35949000 |
| O | 6.74850600  | -1.48110300 | 0.48265200  |
| H | 6.99391200  | -1.19078400 | -1.51961100 |
| H | 5.80272900  | -2.45413900 | -1.09272600 |
| C | 5.66208700  | -1.29961700 | 1.36934400  |
| H | 5.27504700  | 0.79505100  | 0.98022400  |
| H | 5.03829900  | -2.20554900 | 1.43119600  |
| H | 6.05796600  | -1.05937200 | 2.35688400  |
| O | -3.47050300 | -1.43419200 | 2.71205400  |
| H | -3.93001900 | -0.57387600 | 2.63687000  |
| H | -4.10733300 | -2.10854100 | 2.43411000  |
| O | 3.50240900  | -0.25841500 | 1.16475700  |
| H | 3.07648600  | 0.62217300  | 1.18786700  |
| O | -0.24369400 | 1.53480500  | -0.57832700 |
| C | -0.01819000 | 2.59294000  | 0.31904800  |
| C | 1.45308700  | 2.89184700  | 0.54443100  |
| C | -0.47096100 | 2.17562200  | 1.73297400  |
| H | -0.56704800 | 3.46198300  | -0.06050400 |
| O | 1.88932700  | 1.91725200  | 1.50623100  |
| H | 1.59354700  | 3.89891200  | 0.95961000  |
| H | 2.04629100  | 2.76440900  | -0.36269800 |
| C | 0.77668100  | 1.45857300  | 2.28368100  |
| H | -0.71245900 | 3.05783400  | 2.33317500  |
| H | 0.67035700  | 0.37481100  | 2.15206700  |
| H | 0.96264300  | 1.67453000  | 3.33949800  |
| O | -1.61999000 | 1.36280700  | 1.72260400  |
| O | -4.36190100 | 1.07211000  | 1.88317800  |
| H | -3.48125000 | 1.45196200  | 2.04846000  |
| H | -4.37352300 | 0.94833200  | 0.92311900  |
| H | -1.53506200 | 0.70961200  | 0.99985400  |
| H | 0.32317200  | 0.73996300  | -0.36391900 |

#### TS1

|   |             |             |             |
|---|-------------|-------------|-------------|
| N | -1.72916100 | 2.90556400  | -2.91891400 |
| H | -0.90951300 | 3.32161800  | -2.47921800 |
| C | -2.55014100 | 2.23135900  | -1.91740100 |
| C | -1.92850400 | 0.93911600  | -1.35948600 |
| H | -2.84341200 | 2.93279200  | -1.13049200 |
| H | -3.48142800 | 1.91178800  | -2.40006700 |
| O | -1.43206200 | 0.11845000  | -2.13107500 |
| H | -1.36214800 | 2.18165900  | -3.53816400 |
| N | 0.55659400  | -1.31023800 | -0.21665200 |
| C | 1.21905200  | -1.65936900 | -1.49101000 |
| C | 2.49556600  | -0.84012700 | -1.60818400 |
| H | 1.44725700  | -2.72826900 | -1.51242900 |
| H | 0.53839200  | -1.39380500 | -2.30059900 |
| O | 2.55616100  | 0.30182800  | -2.01778900 |
| O | 3.54955700  | -1.51116500 | -1.08277200 |
| O | -3.06944900 | 0.34356800  | -0.42655400 |
| C | -3.61379000 | -0.87954700 | -0.89105100 |

|   |             |             |             |
|---|-------------|-------------|-------------|
| C | -5.01889600 | -1.11903500 | -0.28126300 |
| H | -3.66485700 | -0.83019000 | -1.98181000 |
| C | -2.80979400 | -2.17135100 | -0.48842100 |
| H | -5.35901800 | -0.28781000 | 0.34099200  |
| O | -4.92629100 | -2.29443400 | 0.54075200  |
| C | -3.94092000 | -3.12555100 | -0.09967500 |
| H | -2.23479900 | -2.53742200 | -1.34368200 |
| O | -1.95007900 | -1.97529100 | 0.61902400  |
| H | -3.62609300 | -3.89357900 | 0.60943200  |
| H | -2.72829600 | -1.81859100 | 2.21659100  |
| H | -5.76485700 | -1.29265500 | -1.06954300 |
| H | -4.38579500 | -3.60443400 | -0.98575100 |
| H | 1.25024300  | -1.33996600 | 0.53431300  |
| H | -1.00592500 | -1.83378500 | 0.28664700  |
| C | 4.69518200  | -0.71608700 | -0.72224300 |
| C | 5.91218800  | -1.64960500 | -0.58782500 |
| C | 4.49486300  | -0.16366000 | 0.72900800  |
| H | 4.81799800  | 0.07413000  | -1.46303600 |
| O | 6.34585300  | -1.58651800 | 0.77278100  |
| H | 6.75560800  | -1.34845100 | -1.21588700 |
| H | 5.61456300  | -2.67180300 | -0.86208200 |
| C | 5.21995200  | -1.22622000 | 1.55988700  |
| H | 5.03260700  | 0.79109100  | 0.80849400  |
| H | 4.54150800  | -2.07866300 | 1.72814800  |
| H | 5.58271600  | -0.86325100 | 2.52452000  |
| O | -3.47660700 | -1.50829500 | 2.78817700  |
| H | -3.40015300 | -0.07232900 | 2.44684600  |
| H | -4.24343600 | -1.84549700 | 2.27138700  |
| O | 3.15675800  | -0.03520000 | 1.14463300  |
| H | 2.79768200  | 0.83174600  | 0.85718600  |
| O | -0.89173000 | 1.29379400  | -0.13088900 |
| C | -0.41404700 | 2.57601200  | 0.18334500  |
| C | 1.02161800  | 2.81970500  | -0.32439600 |
| C | -0.24263300 | 2.64086100  | 1.76144200  |
| H | -1.09663100 | 3.36314100  | -0.15381900 |
| O | 1.88794500  | 2.40327200  | 0.74193000  |
| H | 1.19203400  | 3.88957000  | -0.52749500 |
| H | 1.26302700  | 2.22395700  | -1.20559000 |
| C | 1.26719400  | 2.84328000  | 1.95366400  |
| H | -0.81915500 | 3.45121600  | 2.21476100  |
| H | 1.66463200  | 2.25019200  | 2.77963100  |
| H | 1.49617400  | 3.90772200  | 2.11929200  |
| O | -0.70192300 | 1.41301200  | 2.33692300  |
| O | -3.26531400 | 0.88343000  | 2.01334100  |
| H | -2.35999300 | 1.21954300  | 2.30729600  |
| H | -3.16381700 | 0.68593300  | 0.96670800  |
| H | -0.69155600 | 0.80162400  | 1.55761600  |
| H | 0.25052200  | -0.33478400 | -0.29744300 |

#### Intermediate

|   |             |            |             |
|---|-------------|------------|-------------|
| N | -3.69375800 | 2.65251200 | -2.15001000 |
| H | -3.35324600 | 2.49785500 | -3.09444700 |
| C | -2.58280800 | 2.78830600 | -1.24118500 |
| C | -1.51788400 | 1.70768200 | -1.39359600 |
| H | -2.09454400 | 3.76092100 | -1.39440900 |
| H | -2.95065900 | 2.76286900 | -0.21086900 |



|   |             |             |             |
|---|-------------|-------------|-------------|
| O | -1.50487200 | 0.90355900  | -2.29134100 |
| H | -4.21623300 | 1.82313800  | -1.87752000 |
| N | 0.92890300  | -0.97424200 | -0.24041600 |
| C | 1.41176100  | -0.66750100 | -1.59907600 |
| C | 2.75361500  | 0.01881600  | -1.45132000 |
| H | 1.50612000  | -1.59161300 | -2.17236400 |
| H | 0.70310800  | 0.00848200  | -2.08012800 |
| O | 2.90154000  | 1.21180500  | -1.29826000 |
| O | 3.75940200  | -0.86411400 | -1.36268800 |
| O | -3.91524800 | 0.21659100  | -0.42877000 |
| C | -3.76772600 | -1.02537700 | -1.06129500 |
| C | -4.70269800 | -2.13534700 | -0.51457000 |
| H | -3.95885800 | -0.85916400 | -2.12735000 |
| C | -2.34881700 | -1.64705300 | -0.92635800 |
| H | -5.30011500 | -1.78178900 | 0.33086500  |
| O | -3.86753400 | -3.20048300 | -0.06124200 |
| C | -2.66995200 | -3.13346100 | -0.82549800 |
| H | -1.73078100 | -1.40784400 | -1.79677200 |
| O | -1.70936100 | -1.16677000 | 0.24707600  |
| H | -1.89555200 | -3.70418300 | -0.30683000 |
| H | -2.36260800 | -1.96371800 | 1.83554100  |
| H | -5.37497100 | -2.51143300 | -1.29647800 |
| H | -2.83579100 | -3.56511400 | -1.82541200 |
| H | 1.56910900  | -1.63343700 | 0.20171300  |
| H | -0.72161400 | -1.17769500 | 0.05978300  |
| C | 4.98243000  | -0.34254900 | -0.85004300 |
| C | 6.04513300  | -1.44110600 | -0.89328400 |
| C | 4.87210500  | 0.00792800  | 0.67542100  |
| H | 5.26860600  | 0.53689000  | -1.43045500 |
| O | 6.85083900  | -1.19894500 | 0.24335500  |
| H | 6.68158300  | -1.41439900 | -1.77836400 |
| H | 5.55073200  | -2.42209100 | -0.82369000 |
| C | 5.94844500  | -0.89850000 | 1.29238700  |
| H | 5.11204000  | 1.06592100  | 0.81945500  |
| H | 5.45327100  | -1.81040600 | 1.65894300  |
| H | 6.50949400  | -0.43542800 | 2.10494400  |
| O | -2.97136800 | -2.34640200 | 2.49353200  |
| H | -4.08167500 | -0.89997900 | 2.50622100  |
| H | -3.45032400 | -3.00305500 | 1.96587800  |
| O | 3.62092800  | -0.30306900 | 1.23758100  |
| H | 3.06291500  | 0.48636700  | 1.32053900  |
| O | -0.49110700 | 1.66816700  | -0.50140400 |
| C | -0.36867100 | 2.60080900  | 0.57188300  |
| C | 1.10695100  | 2.69489500  | 0.90270400  |
| C | -0.94106900 | 1.97250600  | 1.86037900  |
| H | -0.81402400 | 3.56552500  | 0.32366800  |
| O | 1.38551800  | 1.47157700  | 1.59145100  |
| H | 1.29944600  | 3.55272400  | 1.56200900  |
| H | 1.74311800  | 2.73377100  | 0.01759700  |
| C | 0.23921000  | 1.11273900  | 2.37547400  |
| H | -1.15513700 | 2.77893100  | 2.56923000  |
| H | 0.03088600  | 0.04670200  | 2.22792100  |
| H | 0.44978200  | 1.28842600  | 3.43471200  |
| O | -2.13772200 | 1.27610500  | 1.68500300  |
| O | -4.53158600 | -0.08105700 | 2.21060200  |
| H | -3.95357200 | 0.63682600  | 2.50468400  |

|   |             |             |            |
|---|-------------|-------------|------------|
| H | -4.19687700 | 0.09092200  | 0.50757700 |
| H | -2.03138600 | 0.53434200  | 1.04798200 |
| H | 1.01616700  | -0.10958600 | 0.29750000 |

TS2

|   |             |             |             |
|---|-------------|-------------|-------------|
| N | -1.37376069 | 2.03078227  | -3.04642514 |
| H | -0.55411269 | 2.44683627  | -2.60672914 |
| C | -2.19474069 | 1.35657727  | -2.04491214 |
| C | -1.57310369 | 0.06433427  | -1.48699714 |
| H | -2.48801169 | 2.05801027  | -1.25800314 |
| H | -3.12602769 | 1.03700627  | -2.52757814 |
| O | -1.07666169 | -0.75633173 | -2.25858614 |
| H | -1.00674769 | 1.30687727  | -3.66567514 |
| N | 0.55659400  | -1.31023800 | -0.21665200 |
| C | 1.21905200  | -1.65936900 | -1.49101000 |
| C | 2.49556600  | -0.84012700 | -1.60818400 |
| H | 1.44725700  | -2.72826900 | -1.51242900 |
| H | 0.53839200  | -1.39380500 | -2.30059900 |
| O | 2.55616100  | 0.30182800  | -2.01778900 |
| O | 3.54955700  | -1.51116500 | -1.08277200 |
| O | -3.06944900 | 0.34356800  | -0.42655400 |
| C | -3.61379000 | -0.87954700 | -0.89105100 |
| C | -5.01889600 | -1.11903500 | -0.28126300 |
| H | -3.66485700 | -0.83019000 | -1.98181000 |
| C | -2.80979400 | -2.17135100 | -0.48842100 |
| H | -5.35901800 | -0.28781000 | 0.34099200  |
| O | -4.92629100 | -2.29443400 | 0.54075200  |
| C | -3.94092000 | -3.12555100 | -0.09967500 |
| H | -2.23479900 | -2.53742200 | -1.34368200 |
| O | -1.95007900 | -1.97529100 | 0.61902400  |
| H | -3.62609300 | -3.89357900 | 0.60943200  |
| H | -2.72829600 | -1.81859100 | 2.21659100  |
| H | -5.76485700 | -1.29265500 | -1.06954300 |
| H | -4.38579500 | -3.60443400 | -0.98575100 |
| H | 1.25024300  | -1.33996600 | 0.53431300  |
| H | -1.00592500 | -1.83378500 | 0.28664700  |
| C | 4.69518200  | -0.71608700 | -0.72224300 |
| C | 5.91218800  | -1.64960500 | -0.58782500 |
| C | 4.49486300  | -0.16366000 | 0.72900800  |
| H | 4.81799800  | 0.07413000  | -1.46303600 |
| O | 6.34585300  | -1.58651800 | 0.77278100  |
| H | 6.75560800  | -1.34845100 | -1.21588700 |
| H | 5.61456300  | -2.67180300 | -0.86208200 |
| C | 5.21995200  | -1.22622000 | 1.55988700  |
| H | 5.03260700  | 0.79109100  | 0.80849400  |
| H | 4.54150800  | -2.07866300 | 1.72814800  |
| H | 5.58271600  | -0.86325100 | 2.52452000  |
| O | -3.47660700 | -1.50829500 | 2.78817700  |
| H | -3.40015300 | -0.07232900 | 2.44684600  |
| H | -4.24343600 | -1.84549700 | 2.27138700  |
| O | 3.15675800  | -0.03520000 | 1.14463300  |
| H | 2.79768200  | 0.83174600  | 0.85718600  |
| O | -0.89173000 | 1.29379400  | -0.13088900 |
| C | -0.41404700 | 2.57601200  | 0.18334500  |
| C | 1.02161800  | 2.81970500  | -0.32439600 |
| C | -0.24263300 | 2.64086100  | 1.76144200  |

|   |             |             |             |
|---|-------------|-------------|-------------|
| H | -1.09663100 | 3.36314100  | -0.15381900 |
| O | 1.88794500  | 2.40327200  | 0.74193000  |
| H | 1.19203400  | 3.88957000  | -0.52749500 |
| H | 1.26302700  | 2.22395700  | -1.20559000 |
| C | 1.26719400  | 2.84328000  | 1.95366400  |
| H | -0.81915500 | 3.45121600  | 2.21476100  |
| H | 1.66463200  | 2.25019200  | 2.77963100  |
| H | 1.49617400  | 3.90772200  | 2.11929200  |
| O | -0.70192300 | 1.41301200  | 2.33692300  |
| O | -3.26531400 | 0.88343000  | 2.01334100  |
| H | -2.35999300 | 1.21954300  | 2.30729600  |
| H | -3.16381700 | 0.68593300  | 0.96670800  |
| H | -0.69155600 | 0.80162400  | 1.55761600  |
| H | 0.12109605  | -0.15025357 | -0.27857115 |

Product

|   |             |             |             |
|---|-------------|-------------|-------------|
| N | -4.95698200 | -2.59687500 | -0.01896000 |
| H | -4.96841200 | -1.61073800 | 0.23142800  |
| C | -3.57544700 | -3.00445400 | -0.16502500 |
| C | -2.83152600 | -2.28208100 | -1.28681300 |
| H | -3.05176300 | -2.85671000 | 0.78512800  |
| H | -3.53315400 | -4.07697000 | -0.39301200 |
| O | -3.39994000 | -1.89712800 | -2.29786900 |
| H | -5.41651300 | -2.67071700 | -0.92304000 |
| N | -1.48714200 | -2.12802700 | -1.09962200 |
| C | -0.67870200 | -1.43151300 | -2.06020400 |
| C | -0.51536500 | 0.03423800  | -1.71522400 |
| H | 0.30675500  | -1.88860300 | -2.16207700 |
| H | -1.19039200 | -1.47325300 | -3.02873000 |
| O | -1.36522700 | 0.71367200  | -1.17323100 |
| O | 0.65054000  | 0.52491900  | -2.12480400 |
| O | 0.76529600  | -1.61091500 | 0.51753400  |
| C | 1.88532200  | -2.32600500 | 0.05262500  |
| C | 2.73497900  | -2.99965200 | 1.16087700  |
| H | 1.51141200  | -3.08899000 | -0.64195000 |
| C | 2.91290400  | -1.43289000 | -0.69268600 |
| H | 2.39333300  | -2.71540100 | 2.16011300  |
| O | 4.07499600  | -2.54291700 | 0.99173100  |
| C | 4.21564500  | -2.14391900 | -0.36703300 |
| H | 2.71238200  | -1.38460400 | -1.77182000 |
| O | 2.96741400  | -0.13607900 | -0.14579900 |
| H | 5.08552500  | -1.48879700 | -0.44611600 |
| H | 3.72901700  | 0.07343600  | 1.54726300  |
| H | 2.70700000  | -4.09281000 | 1.06971800  |
| H | 4.35439200  | -3.02400400 | -1.01368500 |
| H | -1.05666400 | -2.29870200 | -0.19712600 |
| H | 2.06645400  | 0.23299800  | -0.02567600 |
| C | 0.81529200  | 1.94802500  | -2.04635300 |
| C | 2.19429600  | 2.30022600  | -2.60145500 |
| C | 0.84677100  | 2.52487900  | -0.59417100 |
| H | 0.00823000  | 2.41487900  | -2.61756700 |
| O | 2.52105600  | 3.50783400  | -1.94562200 |
| H | 2.21411700  | 2.47383000  | -3.67814400 |
| H | 2.90061900  | 1.49879200  | -2.33379500 |
| C | 2.17143600  | 3.30928100  | -0.58472800 |
| H | -0.02401900 | 3.16482900  | -0.43454300 |

|   |             |             |             |
|---|-------------|-------------|-------------|
| H | 2.93160100  | 2.69933900  | -0.07465600 |
| H | 2.10186000  | 4.28705300  | -0.10676200 |
| O | 3.90915200  | -0.06619400 | 2.49607700  |
| H | 2.18844000  | -0.26511300 | 2.92693900  |
| H | 4.32833600  | -0.93812900 | 2.49892900  |
| O | 0.89668600  | 1.53626100  | 0.41061000  |
| H | -0.00270900 | 1.27601700  | 0.68011700  |
| O | -3.30322600 | -0.04276200 | 0.64072500  |
| C | -3.40962200 | 1.16717500  | 1.36025100  |
| C | -3.25210500 | 2.44593800  | 0.50712000  |
| C | -2.26260200 | 1.30950800  | 2.41005600  |
| H | -4.37936500 | 1.14630700  | 1.86467600  |
| O | -1.99885600 | 3.01485400  | 0.86306900  |
| H | -4.05508400 | 3.16014900  | 0.73830500  |
| H | -3.24784200 | 2.23767100  | -0.56433600 |
| C | -1.84781700 | 2.76398400  | 2.24949800  |
| H | -2.58574500 | 1.05896900  | 3.42626100  |
| H | -0.80582700 | 2.94221900  | 2.52669300  |
| H | -2.50592100 | 3.42204100  | 2.83813100  |
| O | -1.16114900 | 0.49691100  | 2.03709200  |
| O | 1.27030700  | -0.61416300 | 2.89508400  |
| H | 0.64601600  | 0.12215500  | 2.95200000  |
| H | 0.96878300  | -1.22070100 | 1.41408000  |
| H | -1.51975700 | -0.31972900 | 1.65014900  |
| H | -2.73938800 | 0.10681700  | -0.14401500 |

### Geometry of the stationary structures based on the structure of Polacek

Reactant

|   |             |             |             |
|---|-------------|-------------|-------------|
| C | -1.29315200 | 5.66063700  | 0.33778400  |
| O | -0.73062500 | 4.90317900  | -0.75393500 |
| C | -0.87674400 | 3.51444000  | -0.50907600 |
| N | 0.30242900  | 2.82230400  | -0.98492700 |
| C | 0.33113800  | 1.61864600  | -1.66081900 |
| N | -0.69604500 | 0.83868700  | -2.03109200 |
| C | -0.27916200 | -0.25595600 | -2.68467400 |
| N | 0.97392700  | -0.63185600 | -2.96319800 |
| C | 1.98589300  | 0.16323400  | -2.56702600 |
| N | 3.25689800  | -0.21231100 | -2.85535800 |
| C | 1.68491100  | 1.36498600  | -1.89433800 |
| N | 2.47877800  | 2.37617400  | -1.38059000 |
| C | 1.62267100  | 3.21515500  | -0.85133900 |
| C | -1.12328000 | 3.39456500  | 1.01295700  |
| O | -1.62402600 | 2.16920700  | 1.45239300  |
| C | -1.96659200 | 4.65635200  | 1.27367000  |
| O | -3.32406200 | 4.37131300  | 0.85367400  |
| N | -5.66202400 | 4.46795500  | -0.83377500 |
| C | -5.62274300 | 4.94119400  | 0.54515800  |
| C | -4.25415000 | 5.34028000  | 1.10111400  |
| O | -3.99834900 | 6.36915400  | 1.68248700  |
| C | 3.45720800  | -3.62990800 | 1.47834600  |
| O | 4.65306900  | -2.99573400 | 1.97932300  |
| C | 4.66855100  | -1.63581800 | 1.60845500  |
| N | 5.96453700  | -1.32838200 | 0.98453500  |
| C | 6.26393600  | -0.23359600 | 0.20042400  |
| N | 5.43004200  | 0.70185800  | -0.29287000 |

|   |             |             |             |
|---|-------------|-------------|-------------|
| C | 6.08142400  | 1.63504500  | -1.00363100 |
| N | 7.39145700  | 1.71019000  | -1.26539900 |
| C | 8.20209000  | 0.74983900  | -0.77602600 |
| N | 9.52142100  | 0.80578200  | -1.06336200 |
| C | 7.64613100  | -0.28663600 | 0.00511400  |
| N | 8.20097700  | -1.37616200 | 0.65042000  |
| C | 7.17459000  | -1.95784900 | 1.22563600  |
| C | 3.47682000  | -1.40399800 | 0.64504800  |
| O | 2.90991500  | -0.13254600 | 0.72401800  |
| C | 2.50506700  | -2.50830800 | 1.08537900  |
| O | 1.78451500  | -2.08044600 | 2.25238700  |
| N | -1.29611000 | -0.35600200 | 3.31591000  |
| C | -0.02894500 | -1.04682300 | 3.38411300  |
| C | 0.54258700  | -1.55844300 | 2.06230200  |
| O | -0.02778800 | -1.54938800 | 0.99268300  |
| H | -1.99188900 | 6.39808700  | -0.06222000 |
| H | -0.48923800 | 6.19514200  | 0.85977900  |
| H | -1.97928800 | 4.97902700  | 2.31580400  |
| H | -2.34347600 | 1.86413100  | 0.85888700  |
| H | -6.27136000 | 5.81384500  | 0.65423300  |
| H | -0.16411200 | 3.54451100  | 1.52436500  |
| H | -1.72456100 | 3.09368300  | -1.06412200 |
| H | -1.06686800 | -0.92406600 | -3.02349100 |
| H | 3.38799800  | -1.13918900 | -3.23452700 |
| H | 1.87771500  | 4.15293400  | -0.37830500 |
| H | 3.04795100  | -4.26357200 | 2.26848900  |
| H | 3.70683500  | -4.25333100 | 0.60961200  |
| H | 5.45670000  | 2.42304100  | -1.41775200 |
| H | 9.88091800  | 1.62690900  | -1.52684800 |
| H | -5.03182200 | 3.67950700  | -0.97000900 |
| H | -5.35846400 | 5.20222100  | -1.46979600 |
| H | 0.73004700  | -0.39729000 | 3.83650400  |
| H | -1.99280700 | -0.92129500 | 2.83270100  |
| H | -1.20504000 | 0.49541700  | 2.76258000  |
| H | 1.79769400  | -2.77944900 | 0.30095600  |
| H | 3.81022400  | -1.64693500 | -0.37607000 |
| H | 4.55182500  | -1.00320500 | 2.49741700  |
| H | 7.21411000  | -2.85438000 | 1.82727000  |
| H | 3.56411100  | 0.48185300  | 0.31952700  |
| C | -4.89993200 | -0.22882500 | 1.12404300  |
| O | -3.67123300 | -0.96796300 | 1.20995900  |
| C | -3.20272000 | -1.26174500 | -0.10058800 |
| N | -3.21981400 | -2.69813300 | -0.34458600 |
| C | -4.31589300 | -3.54062200 | -0.40203600 |
| N | -5.61838000 | -3.23120700 | -0.30023300 |
| C | -6.39141000 | -4.31568300 | -0.42103000 |
| N | -6.02589700 | -5.59160000 | -0.61609400 |
| C | -4.71244300 | -5.86993000 | -0.70463400 |
| N | -4.32723500 | -7.16354900 | -0.86352800 |
| C | -3.78087700 | -4.81731700 | -0.60025900 |
| N | -2.39767200 | -4.78295000 | -0.65925300 |
| C | -2.11083600 | -3.51441200 | -0.49506500 |
| C | -4.10401400 | -0.46492200 | -1.09562700 |
| O | -3.44688200 | 0.04305400  | -2.21884700 |
| C | -4.79479000 | 0.56160400  | -0.17418300 |
| O | -3.92774400 | 1.70636400  | -0.05911200 |

|   |             |             |             |
|---|-------------|-------------|-------------|
| H | -4.97263100 | 0.39599700  | 2.02021000  |
| H | -5.75457200 | -0.91601800 | 1.08224000  |
| H | -5.76642100 | 0.88152000  | -0.56644900 |
| H | -2.65650400 | 0.56274000  | -1.95240000 |
| H | -4.88634800 | -1.13169700 | -1.46661100 |
| H | -2.15699500 | -0.95493200 | -0.16689800 |
| H | -7.46396700 | -4.14401100 | -0.35485200 |
| H | -5.03906800 | -7.83211700 | -1.11996700 |
| H | -1.11695800 | -3.08955600 | -0.45684700 |
| H | -4.29055900 | 2.32655300  | 0.59427800  |
| H | -3.37235800 | -7.35070300 | -1.13183500 |
| H | -6.03435700 | 4.15889800  | 1.19922300  |
| H | -0.10642800 | -1.91697200 | 4.05145600  |
| H | 4.02360800  | 0.21902300  | -2.35596300 |
| H | 10.15898700 | 0.16742000  | -0.61215300 |

#### TS1

|   |             |             |             |
|---|-------------|-------------|-------------|
| C | -1.42508831 | 5.65385055  | -1.70796733 |
| O | -0.42173431 | 4.69380455  | -2.06964933 |
| C | -0.57408031 | 3.60322855  | -1.17228733 |
| N | 0.53763069  | 2.70224255  | -1.33319033 |
| C | 0.45910969  | 1.46339455  | -1.94418033 |
| N | -0.63702231 | 0.79327455  | -2.32671933 |
| C | -0.32836031 | -0.37415845 | -2.90905033 |
| N | 0.88211469  | -0.90439045 | -3.11555833 |
| C | 1.96324869  | -0.21838145 | -2.69950333 |
| N | 3.18713869  | -0.77925345 | -2.87232133 |
| C | 1.77994869  | 1.03923555  | -2.08867033 |
| N | 2.66345169  | 1.98855855  | -1.59833233 |
| C | 1.89030369  | 2.95637755  | -1.17367433 |
| C | -0.73509931 | 4.30776655  | 0.18396267  |
| O | -1.31860626 | 3.45790119  | 1.14441733  |
| C | -1.67336631 | 5.50227055  | -0.18130933 |
| O | -3.01998731 | 5.27692555  | 0.16660867  |
| N | -3.01749279 | 4.13841314  | 4.28287924  |
| C | -2.75164279 | 3.55358514  | 2.98007324  |
| C | -1.75946579 | 4.32010314  | 2.11485824  |
| O | -1.16380479 | 5.31791214  | 2.44219824  |
| C | 2.96690700  | -4.05620800 | 1.55256500  |
| O | 4.20496800  | -3.50040000 | 2.04308200  |
| C | 4.33963900  | -2.16491000 | 1.61068200  |
| N | 5.68170900  | -1.98526900 | 1.04150600  |
| C | 6.10476300  | -0.91907700 | 0.27704100  |
| N | 5.37712400  | 0.10107200  | -0.21226500 |
| C | 6.12666200  | 0.96296600  | -0.91327100 |
| N | 7.44087700  | 0.90357100  | -1.16340200 |
| C | 8.14441200  | -0.13541400 | -0.66995000 |
| N | 9.46639400  | -0.21480600 | -0.94681600 |
| C | 7.47657500  | -1.11404000 | 0.09779400  |
| N | 7.90487700  | -2.26261700 | 0.73738300  |
| C | 6.81470200  | -2.74141200 | 1.29059100  |
| C | 3.21338500  | -1.89717900 | 0.57874900  |
| O | 2.74315900  | -0.58259600 | 0.56907800  |
| C | 2.13600300  | -2.88568300 | 1.04809900  |
| O | 1.43607800  | -2.29402800 | 2.15868300  |
| N | -1.43552600 | -0.16833000 | 2.98347900  |

|   |             |             |             |
|---|-------------|-------------|-------------|
| C | -0.07694200 | -0.68365200 | 3.01014500  |
| C | 0.28008100  | -1.64133300 | 1.88032200  |
| O | -0.35254000 | -1.77637100 | 0.85495700  |
| H | -2.36259131 | 5.45720855  | -2.24606233 |
| H | -1.04935131 | 6.63792555  | -1.99801933 |
| H | -1.37790131 | 6.39640755  | 0.36881367  |
| H | -2.57072024 | 2.35991919  | 0.36904306  |
| H | -2.40853079 | 2.51440614  | 3.08982224  |
| H | 0.22750269  | 4.66921355  | 0.55228067  |
| H | -1.46991431 | 3.01905255  | -1.40833133 |
| H | -1.17506231 | -0.95983245 | -3.25915733 |
| H | 3.25169069  | -1.56435645 | -3.50457933 |
| H | 2.23895469  | 3.88487955  | -0.74274133 |
| H | 2.47813900  | -4.58874600 | 2.37205200  |
| H | 3.17859600  | -4.76299100 | 0.73970100  |
| H | 5.59088200  | 1.81200300  | -1.33143200 |
| H | 9.91373100  | 0.57970800  | -1.37965300 |
| H | -3.24061479 | 5.12599814  | 4.16740124  |
| H | -2.16654579 | 4.11821914  | 4.84239024  |
| H | 0.64202600  | 0.14287100  | 2.91597200  |
| H | -2.08428300 | -0.88148200 | 3.31220000  |
| H | -1.72298100 | -0.01381800 | 2.01758200  |
| H | 1.42157600  | -3.14776300 | 0.26702500  |
| H | 3.56377400  | -2.21752300 | -0.41409400 |
| H | 4.22779900  | -1.47921600 | 2.46037200  |
| H | 6.75163300  | -3.64323300 | 1.88183700  |
| H | 3.47580700  | -0.03458600 | 0.20144300  |
| C | -4.57980100 | 0.79711000  | 0.95809800  |
| O | -3.65569900 | -0.31182600 | 0.91558500  |
| C | -3.46781900 | -0.76145400 | -0.41929600 |
| N | -3.91070500 | -2.13938400 | -0.55511300 |
| C | -5.19860800 | -2.63505300 | -0.46035700 |
| N | -6.34639000 | -1.95774500 | -0.30202100 |
| C | -7.39953000 | -2.78134800 | -0.26813700 |
| N | -7.42447100 | -4.11932900 | -0.36524200 |
| C | -6.25508000 | -4.76882800 | -0.51058500 |
| N | -6.26385500 | -6.12636900 | -0.56893000 |
| C | -5.06039600 | -4.02252800 | -0.56595900 |
| N | -3.73201800 | -4.38994900 | -0.70611600 |
| C | -3.09004400 | -3.24792400 | -0.68204100 |
| C | -4.21657500 | 0.24014400  | -1.34927300 |
| O | -3.55074700 | 0.52193000  | -2.54611800 |
| C | -4.48925400 | 1.45249800  | -0.41714200 |
| O | -3.43165200 | 2.42243100  | -0.47888900 |
| H | -4.18024000 | 1.44462400  | 1.74168500  |
| H | -5.59000400 | 0.44632400  | 1.19291800  |
| H | -5.40202200 | 1.97889000  | -0.70428700 |
| H | -2.66621600 | 0.89792600  | -2.34703900 |
| H | -5.18428600 | -0.18909400 | -1.61915100 |
| H | -2.39588200 | -0.76951500 | -0.63053400 |
| H | -8.37070800 | -2.30572400 | -0.14668500 |
| H | -7.15459500 | -6.57995100 | -0.71140800 |
| H | -2.01578700 | -3.12614200 | -0.73529500 |
| H | -3.37441370 | 4.24717585  | -0.22841363 |
| H | -5.42744300 | -6.60032200 | -0.87636000 |
| H | -3.68751779 | 3.51545414  | 2.40822524  |

|   |             |             |             |
|---|-------------|-------------|-------------|
| H | 0.13610200  | -1.15939900 | 3.97255700  |
| H | 4.01247969  | -0.21986345 | -2.71160233 |
| H | 10.03174900 | -0.90229700 | -0.47168000 |

Intermediate

|   |             |             |             |
|---|-------------|-------------|-------------|
| C | -1.43685300 | 5.73881100  | -1.18051000 |
| O | -0.47240900 | 4.77922900  | -1.61779200 |
| C | -0.75259000 | 3.57754700  | -0.94407200 |
| N | 0.36334300  | 2.68461900  | -1.09104300 |
| C | 0.30861000  | 1.43341800  | -1.66022800 |
| N | -0.77100200 | 0.74900400  | -2.05013900 |
| C | -0.44443800 | -0.43286700 | -2.57608600 |
| N | 0.77212600  | -0.95738100 | -2.74210600 |
| C | 1.83255300  | -0.24772200 | -2.33437500 |
| N | 3.06722300  | -0.76774600 | -2.49405600 |
| C | 1.62775000  | 1.02002300  | -1.75694700 |
| N | 2.49053800  | 1.98187800  | -1.26733800 |
| C | 1.70196700  | 2.95146100  | -0.89039600 |
| C | -1.05814000 | 4.04318300  | 0.47719100  |
| O | -1.75509600 | 3.03203500  | 1.17942400  |
| C | -1.93948400 | 5.28729200  | 0.21343600  |
| O | -3.31125400 | 4.98197600  | 0.24116700  |
| N | -4.48359900 | 3.28133200  | 2.70381800  |
| C | -3.24632600 | 2.54682200  | 2.97645600  |
| C | -2.05846300 | 3.34270900  | 2.48365700  |
| O | -1.51664600 | 4.24947400  | 3.05567700  |
| C | 3.16371400  | -3.78124800 | 1.43165200  |
| O | 4.28119500  | -3.15564600 | 2.07541800  |
| C | 4.39974900  | -1.82605700 | 1.65171700  |
| N | 5.74643600  | -1.60685900 | 1.12005500  |
| C | 6.12728100  | -0.60236700 | 0.26476000  |
| N | 5.36012800  | 0.31430500  | -0.35313100 |
| C | 6.08388200  | 1.14958600  | -1.09835600 |
| N | 7.40555400  | 1.15374700  | -1.29385400 |
| C | 8.14508400  | 0.21878800  | -0.67777700 |
| N | 9.47425000  | 0.19820000  | -0.87970600 |
| C | 7.50831300  | -0.72223000 | 0.15784500  |
| N | 7.98210900  | -1.76598500 | 0.92236000  |
| C | 6.90662400  | -2.25547600 | 1.48196300  |
| C | 3.33799300  | -1.58391300 | 0.56200500  |
| O | 2.77935400  | -0.31175500 | 0.60395200  |
| C | 2.30140800  | -2.65963200 | 0.88250400  |
| O | 1.46516800  | -2.15722800 | 1.92362800  |
| N | -1.19818400 | 0.31399500  | 2.32200600  |
| C | -0.05987900 | -0.50953700 | 2.65703600  |
| C | 0.44556200  | -1.37109100 | 1.51807600  |
| O | 0.01043100  | -1.35068300 | 0.39207000  |
| H | -2.28895800 | 5.76892000  | -1.87071600 |
| H | -0.94457600 | 6.71311200  | -1.17386800 |
| H | -1.78705100 | 6.04915500  | 0.97806600  |
| H | -3.12821600 | 1.99036300  | 0.13035300  |
| H | -3.13986700 | 2.38679100  | 4.05026300  |
| H | -0.13609800 | 4.31221400  | 1.00123900  |
| H | -1.62416500 | 3.05431300  | -1.36666100 |
| H | -1.28249900 | -1.03698400 | -2.91916000 |
| H | 3.16664100  | -1.58574600 | -3.07657700 |



|   |             |             |             |
|---|-------------|-------------|-------------|
| H | 2.02514000  | 3.89754600  | -0.47675100 |
| H | 2.63456600  | -4.38489900 | 2.17130000  |
| H | 3.51763900  | -4.42623500 | 0.61849700  |
| H | 5.51852600  | 1.92584700  | -1.61010800 |
| H | 9.89739300  | 0.93679200  | -1.42024000 |
| H | -4.47454600 | 3.59823600  | 1.73394200  |
| H | -4.49726400 | 4.13189400  | 3.26408500  |
| H | 0.78824400  | 0.11808000  | 2.95509000  |
| H | -2.01356200 | -0.26498600 | 2.12153200  |
| H | -1.00054300 | 0.81462500  | 1.45607700  |
| H | 1.69689900  | -2.93976900 | 0.01788700  |
| H | 3.78015400  | -1.81289100 | -0.41567600 |
| H | 4.23683700  | -1.14617400 | 2.49640700  |
| H | 6.87127100  | -3.09894200 | 2.15753500  |
| H | 3.42773000  | 0.30005600  | 0.19453500  |
| C | -5.07019600 | 0.61336100  | 0.63351600  |
| O | -3.87485100 | -0.16163800 | 0.87166800  |
| C | -3.40968000 | -0.67004900 | -0.36837100 |
| N | -3.54650200 | -2.11083000 | -0.42747300 |
| C | -4.71005700 | -2.84307500 | -0.37480600 |
| N | -5.97174700 | -2.40321200 | -0.27078800 |
| C | -6.83850500 | -3.41180900 | -0.26443900 |
| N | -6.59800000 | -4.72740300 | -0.34204100 |
| C | -5.32633600 | -5.13298800 | -0.43951900 |
| N | -5.05836600 | -6.45755600 | -0.48886100 |
| C | -4.30021600 | -4.16983100 | -0.46381000 |
| N | -2.92831200 | -4.27109200 | -0.57201900 |
| C | -2.52331400 | -3.03015000 | -0.54153400 |
| C | -4.21509000 | 0.06767300  | -1.47605500 |
| O | -3.48493600 | 0.35044900  | -2.62384900 |
| C | -4.76429600 | 1.27252800  | -0.69932600 |
| O | -3.75975700 | 2.27638900  | -0.55519300 |
| H | -5.19203500 | 1.31492500  | 1.46275500  |
| H | -5.93484100 | -0.05441300 | 0.55838500  |
| H | -5.62172700 | 1.73987700  | -1.18519500 |
| H | -2.68508600 | 0.85299300  | -2.36778200 |
| H | -5.06138100 | -0.56022600 | -1.77286100 |
| H | -2.33492100 | -0.46670200 | -0.45150700 |
| H | -7.88790400 | -3.13652500 | -0.18820200 |
| H | -5.83148100 | -7.08763200 | -0.63956500 |
| H | -1.49378800 | -2.69471200 | -0.59249000 |
| H | -3.49645100 | 4.18531000  | -0.29509400 |
| H | -4.12724500 | -6.75318300 | -0.74011700 |
| H | -3.27427100 | 1.57266900  | 2.48749000  |
| H | -0.28724300 | -1.15082100 | 3.51448900  |
| H | 3.88267700  | -0.21790000 | -2.25485000 |
| H | 10.05065400 | -0.44786300 | -0.36290300 |

TS2

|   |             |             |             |
|---|-------------|-------------|-------------|
| C | -1.14038600 | 5.80855800  | -0.61268500 |
| O | -0.18622100 | 4.98920100  | -1.30735000 |
| C | -0.54165600 | 3.65077800  | -1.02214300 |
| N | 0.55615000  | 2.78937800  | -1.41225500 |
| C | 0.45292500  | 1.57722600  | -2.05966800 |
| N | -0.64951300 | 0.94868200  | -2.49438200 |
| C | -0.36045600 | -0.21287700 | -3.09403900 |

|   |             |             |             |
|---|-------------|-------------|-------------|
| N | 0.84109100  | -0.77929500 | -3.27508800 |
| C | 1.92620100  | -0.13479900 | -2.81256300 |
| N | 3.14391900  | -0.74158000 | -2.94128600 |
| C | 1.76738500  | 1.11358300  | -2.18264500 |
| N | 2.66538500  | 2.01148200  | -1.63149500 |
| C | 1.90399100  | 2.98486700  | -1.18561900 |
| C | -0.88239900 | 3.63835200  | 0.49223600  |
| O | -1.64602100 | 2.55745700  | 0.87610000  |
| C | -1.57087100 | 5.03995100  | 0.66439700  |
| O | -2.97712200 | 4.98164300  | 0.83435800  |
| N | -3.04058600 | 3.72056200  | 3.66999500  |
| C | -2.77308300 | 2.31595500  | 3.47609900  |
| C | -1.37602500 | 1.96516100  | 2.98477100  |
| O | -0.33037900 | 2.41904400  | 3.36533800  |
| C | 2.75316900  | -3.83502300 | 1.46899300  |
| O | 3.96762600  | -3.32923100 | 2.05529300  |
| C | 4.20358800  | -2.00671800 | 1.62384100  |
| N | 5.57105200  | -1.90236100 | 1.10380300  |
| C | 6.06438000  | -0.86605100 | 0.33806000  |
| N | 5.39663900  | 0.17816900  | -0.18326300 |
| C | 6.20255300  | 0.99200200  | -0.87834100 |
| N | 7.51895400  | 0.86864000  | -1.09135200 |
| C | 8.16174400  | -0.19184600 | -0.56248000 |
| N | 9.48585000  | -0.33347300 | -0.80046800 |
| C | 7.42959900  | -1.12699900 | 0.20140000  |
| N | 7.78606300  | -2.28483100 | 0.86912100  |
| C | 6.66057700  | -2.70566700 | 1.39705200  |
| C | 3.14415200  | -1.66870200 | 0.54134400  |
| O | 2.71393800  | -0.34114900 | 0.56686200  |
| C | 2.00850200  | -2.63793900 | 0.90076100  |
| O | 1.21362400  | -2.02835400 | 1.94950700  |
| N | -1.29553100 | 0.58454000  | 2.22015300  |
| C | -0.21958300 | -0.31439200 | 2.67005700  |
| C | 0.21861100  | -1.22628700 | 1.53896200  |
| O | -0.27765400 | -1.21737900 | 0.43438900  |
| H | -2.02649700 | 5.97957100  | -1.24014300 |
| H | -0.65580700 | 6.76861300  | -0.41720900 |
| H | -1.19634300 | 5.53557700  | 1.56416800  |
| H | -2.93744200 | 2.39366200  | -0.13176900 |
| H | -2.87640300 | 1.78414700  | 4.43777800  |
| H | 0.07809700  | 3.66789700  | 1.03895200  |
| H | -1.41421300 | 3.32544100  | -1.60317800 |
| H | -1.21439400 | -0.76448100 | -3.47925800 |
| H | 3.20033500  | -1.47552300 | -3.63474300 |
| H | 2.25749900  | 3.88681000  | -0.70661600 |
| H | 2.18325900  | -4.35259500 | 2.24475800  |
| H | 2.99545900  | -4.54666000 | 0.66904100  |
| H | 5.71818100  | 1.85698900  | -1.32529000 |
| H | 9.97875100  | 0.43077500  | -1.23823900 |
| H | -3.07745000 | 4.18959200  | 2.76035800  |
| H | -2.29286400 | 4.14718100  | 4.21333200  |
| H | 0.62593300  | 0.31232200  | 2.96727500  |
| H | -2.22118500 | 0.14430800  | 2.11389000  |
| H | -1.12189100 | 1.03070400  | 1.27030400  |
| H | 1.36172600  | -2.87405400 | 0.05592400  |
| H | 3.53464500  | -1.95552700 | -0.44505500 |

|   |             |             |             |
|---|-------------|-------------|-------------|
| H | 4.09792800  | -1.31537400 | 2.46952600  |
| H | 6.54014000  | -3.59565100 | 1.99761700  |
| H | 3.44855200  | 0.19132900  | 0.18031400  |
| C | -4.96845200 | 1.03879900  | 0.56785300  |
| O | -3.87841000 | 0.09686300  | 0.78630600  |
| C | -3.51686800 | -0.47232400 | -0.47722900 |
| N | -3.82117400 | -1.89655800 | -0.50198400 |
| C | -5.05691200 | -2.51205300 | -0.40223700 |
| N | -6.26776300 | -1.94756000 | -0.27770800 |
| C | -7.23577300 | -2.86805400 | -0.22257900 |
| N | -7.12901900 | -4.20482500 | -0.27175000 |
| C | -5.90093800 | -4.74055600 | -0.38850300 |
| N | -5.77598200 | -6.09444900 | -0.40106600 |
| C | -4.78449100 | -3.88280500 | -0.46332700 |
| N | -3.42757200 | -4.12408600 | -0.59833200 |
| C | -2.89938800 | -2.92460800 | -0.61296000 |
| C | -4.25306800 | 0.35567600  | -1.57584000 |
| O | -3.50596600 | 0.54704000  | -2.74037100 |
| C | -4.68022200 | 1.63237600  | -0.80542900 |
| O | -3.66377400 | 2.61935300  | -0.79007700 |
| H | -4.94088500 | 1.77802000  | 1.37025600  |
| H | -5.91842500 | 0.49369300  | 0.58373700  |
| H | -5.56627800 | 2.08754000  | -1.25735300 |
| H | -2.69129900 | 1.05098000  | -2.52663300 |
| H | -5.15944200 | -0.18138700 | -1.86910800 |
| H | -2.43478300 | -0.39422500 | -0.60056100 |
| H | -8.24996500 | -2.48545900 | -0.12769900 |
| H | -6.61798200 | -6.63326800 | -0.54517500 |
| H | -1.84423100 | -2.70223100 | -0.70032900 |
| H | -3.35026000 | 4.30843900  | 0.22783600  |
| H | -4.89851700 | -6.49037400 | -0.70528300 |
| H | -3.51278300 | 1.89114900  | 2.79803200  |
| H | -0.53887400 | -0.89732900 | 3.53885600  |
| H | 3.96624400  | -0.16785400 | -2.81178800 |
| H | 10.00776500 | -1.03921100 | -0.30309900 |

Product

|   |             |             |             |
|---|-------------|-------------|-------------|
| C | -0.77475100 | 5.89548900  | 0.05193000  |
| O | 0.18899300  | 5.25328200  | -0.80171500 |
| C | -0.08311500 | 3.86880500  | -0.74297700 |
| N | 1.05241700  | 3.13860700  | -1.26545800 |
| C | 1.00019700  | 1.91766600  | -1.90377900 |
| N | -0.07682300 | 1.21281400  | -2.27975200 |
| C | 0.26108600  | 0.07016300  | -2.88920300 |
| N | 1.48804200  | -0.41043400 | -3.13538900 |
| C | 2.55073000  | 0.31778500  | -2.74623200 |
| N | 3.79476700  | -0.18957700 | -2.96638800 |
| C | 2.33636600  | 1.55016500  | -2.09728600 |
| N | 3.19572300  | 2.51260700  | -1.59453200 |
| C | 2.39420500  | 3.42860600  | -1.10427900 |
| C | -0.37648800 | 3.60339400  | 0.74253300  |
| O | -1.06570500 | 2.38552200  | 0.88621400  |
| C | -1.16468400 | 4.88467000  | 1.16867600  |
| O | -2.55652600 | 4.69393700  | 1.30579500  |
| N | -3.62018500 | 2.50740700  | 3.63351200  |
| C | -3.33339000 | 1.08698300  | 3.66860000  |

|   |             |             |             |
|---|-------------|-------------|-------------|
| C | -1.85002500 | 0.69847500  | 3.66958800  |
| O | -0.94602900 | 1.51626300  | 3.45899800  |
| C | 2.35479000  | -3.97054000 | 0.98441100  |
| O | 3.66216700  | -3.72764800 | 1.54202300  |
| C | 3.98624700  | -2.35769800 | 1.42514200  |
| N | 5.31342000  | -2.23764800 | 0.81180800  |
| C | 5.87186900  | -1.08554200 | 0.30171900  |
| N | 5.31038900  | 0.12865300  | 0.17218000  |
| C | 6.14442200  | 1.00902300  | -0.39721800 |
| N | 7.40195500  | 0.80631100  | -0.81431100 |
| C | 7.94164800  | -0.42005200 | -0.66740100 |
| N | 9.20202100  | -0.63368500 | -1.11504000 |
| C | 7.16678900  | -1.44406600 | -0.08317100 |
| N | 7.41793700  | -2.77666300 | 0.18823000  |
| C | 6.29890500  | -3.20643400 | 0.72303600  |
| C | 2.86926800  | -1.69405900 | 0.57378300  |
| O | 2.60997900  | -0.35954800 | 0.88319000  |
| C | 1.68113500  | -2.60988000 | 0.89006200  |
| O | 1.16525700  | -2.26456300 | 2.19543900  |
| N | -1.57501200 | -0.61368500 | 3.91195200  |
| C | -0.25158800 | -1.15188300 | 3.69973100  |
| C | -0.01737300 | -1.62275600 | 2.26531200  |
| O | -0.78307600 | -1.45642900 | 1.34329900  |
| H | -1.67456200 | 6.16022700  | -0.52017900 |
| H | -0.31087300 | 6.81239500  | 0.42369000  |
| H | -0.82715900 | 5.23138200  | 2.14871400  |
| H | -2.56465700 | 2.36635700  | -0.13827800 |
| H | -3.81509900 | 0.63812400  | 4.54817900  |
| H | 0.58172900  | 3.56885100  | 1.27738200  |
| H | -0.95123500 | 3.58907900  | -1.35350400 |
| H | -0.57116400 | -0.54151400 | -3.22826000 |
| H | 3.86526500  | -0.94216300 | -3.63704200 |
| H | 2.70624900  | 4.35309300  | -0.63972900 |
| H | 1.82339400  | -4.65912900 | 1.64549300  |
| H | 2.44852900  | -4.42585300 | -0.01034500 |
| H | 5.73801500  | 2.00379100  | -0.55809400 |
| H | 9.75349400  | 0.16784800  | -1.38401800 |
| H | -3.20149200 | 2.94947400  | 2.81483600  |
| H | -3.19943600 | 2.96968500  | 4.43736300  |
| H | 0.47437700  | -0.36156000 | 3.90896500  |
| H | -2.35336000 | -1.26057400 | 3.92331500  |
| H | -1.01295100 | 2.09665500  | 1.82635800  |
| H | 0.87903000  | -2.54895000 | 0.15470100  |
| H | 3.12109600  | -1.83339800 | -0.48952800 |
| H | 4.01709000  | -1.89305800 | 2.41874100  |
| H | 6.10946800  | -4.21317800 | 1.06530300  |
| H | 3.42027100  | 0.13635100  | 0.61553800  |
| C | -5.00757600 | 1.52283400  | 0.12991100  |
| O | -4.17153700 | 0.42601200  | 0.57011400  |
| C | -3.55816100 | -0.18169000 | -0.56242700 |
| N | -4.00751300 | -1.55933200 | -0.71359800 |
| C | -5.27643500 | -2.02201800 | -1.01437900 |
| N | -6.38195300 | -1.31693700 | -1.30007100 |
| C | -7.42310000 | -2.11601500 | -1.55312100 |
| N | -7.47537600 | -3.45721900 | -1.54778700 |
| C | -6.35331300 | -4.13492200 | -1.24732800 |

|   |             |             |             |
|---|-------------|-------------|-------------|
| N | -6.40305300 | -5.49366900 | -1.19730500 |
| C | -5.17451500 | -3.41650400 | -0.96305400 |
| N | -3.89061500 | -3.81874300 | -0.63404200 |
| C | -3.24084800 | -2.68928300 | -0.48839500 |
| C | -3.88370800 | 0.72869200  | -1.78933000 |
| O | -2.87651000 | 0.79796400  | -2.75431400 |
| C | -4.28836000 | 2.05414800  | -1.10247700 |
| O | -3.14843100 | 2.84701800  | -0.77107600 |
| H | -5.06639500 | 2.23888800  | 0.95330300  |
| H | -6.00851900 | 1.15132200  | -0.12189500 |
| H | -4.91965000 | 2.67484600  | -1.74216300 |
| H | -2.07880900 | 1.24178400  | -2.39178700 |
| H | -4.77037900 | 0.32892500  | -2.28834300 |
| H | -2.47926800 | -0.23720000 | -0.38987300 |
| H | -8.35717300 | -1.61518000 | -1.79961500 |
| H | -7.21243600 | -5.93927200 | -1.60512400 |
| H | -2.20144600 | -2.59065600 | -0.20460900 |
| H | -2.90735900 | 4.25245600  | 0.50285200  |
| H | -5.53105600 | -6.00237500 | -1.19236500 |
| H | -3.78187700 | 0.61151400  | 2.78678400  |
| H | -0.05406400 | -1.97920100 | 4.38836500  |
| H | 4.58859600  | 0.42696700  | -2.86671600 |
| H | 9.67081200  | -1.49421800 | -0.87445900 |
